# Supplementary material for: The Drosophila Mutagen-Sensitivity Gene mus109 Encodes DmDNA2
Source: MDPI journal article supplement (doi:10.3390/genes13020312), 2022-02-07
Supplement: s1 [file s1]

## Supplementary Materials

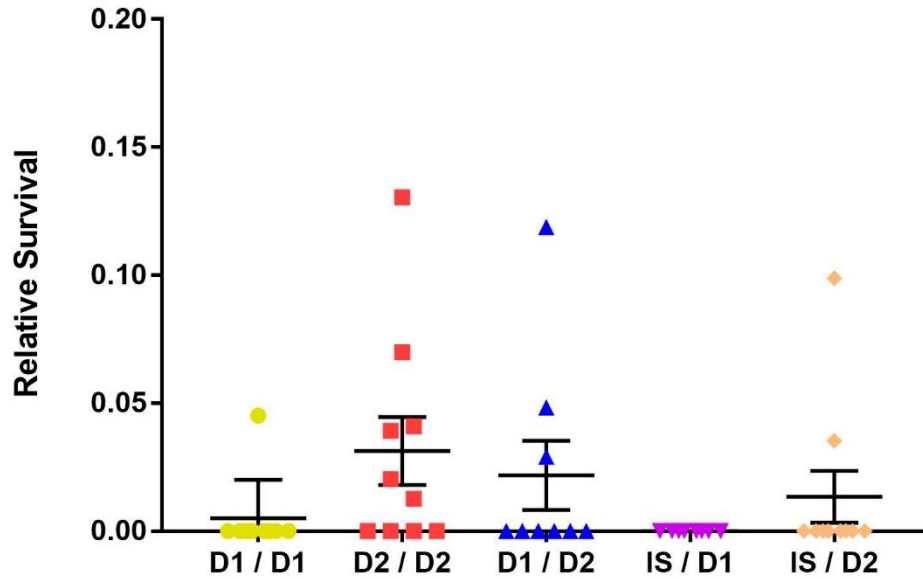

**Figure S1.** Relative survival of flies exposed to 0.05% methyl methanesulfonate for the indicated *mus109* allelic combinations. *mus109<sup>IS</sup>/mus109<sup>IS</sup>* could not be tested since the *mus109<sup>IS</sup>* allele is homozygous lethal. Each point represents one vial containing between 16 and 78 progeny (average = 44 progeny across all Brood 2 vials of all genotypes). The large horizontal line is the mean, while the upper and lower lines show the standard deviation. Data are the same as in Figure 1, with wild-type excluded, and scale is modified to show values in detail.

**Table S1.** Primers used in this study.

| Primer*    | Sequence (5' --> 3')  |
|------------|-----------------------|
| DNA2 -87   | CAGTCACTCTGTTCCCGCC   |
| DNA2 1013  | CCATGGAACACAAGGGCC    |
| DNA2 1136a | CTCCCGCTAGCAACTTCTC   |
| DNA2 1230a | CAGTGGATCCTCCTTGCTAGC |
| DNA2 1729  | GTTCCACATCCCGTTTGCCCG |
| DNA2 1910  | GAGGGAGAACGCTTCCAGGAG |
| DNA2 2081  | GTTGATCAAGGGACTGCCCCG |
| DNA2 2202a | GATTGTCCACAGCCGAATGCG |
| DNA2 2517  | CCGCCGATTGTCAGATCC    |
| DNA2 2576a | TTGGAATAAAGTCTCATCCG  |
| DNA2 2667a | CATAGGTGAGCTCATTGGCC  |
| DNA2 3160  | CAGGTGGTGATTTCTCTGAC  |
| DNA2 3516a | CATATCTCACTAAATCCC    |
| DNA2 3677a | GAGGGGTCTTAAGTGAGG    |

\* Primers are numbered according to their location with respect to the ATG of CG2990. Antisense primers are indicated with 'a'.

**Table S2.** Relative survival of X chromosome deletions crossed to *mus109<sup>D2</sup>*.

| <b>Deletion</b>    | <b>Relative Survival</b> | <b>n*</b> |
|--------------------|--------------------------|-----------|
| <i>Df(1)ED6989</i> | 0                        | 978       |
| <i>Df(1)ED6991</i> | 0                        | 1111      |
| <i>Df(1)BSC539</i> | 0                        | 430       |
| <i>Df(1)BSC754</i> | 0                        | 693       |

\* n = total number of flies scored across all Brood 2 vials for that deletion.
